# Supplementary material
Source: PubMed Central journal article supplement (PMC4900885)

**A**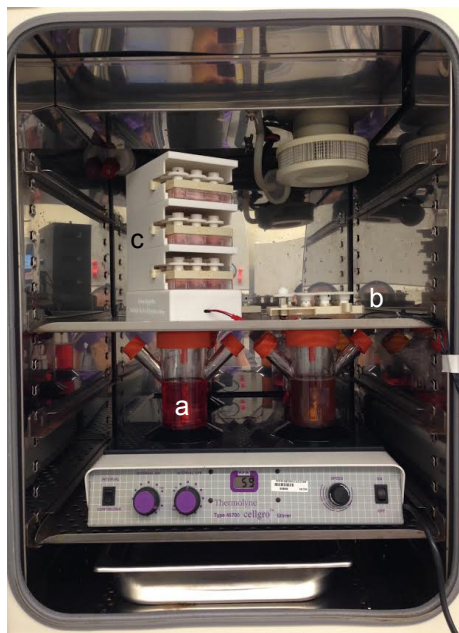**B**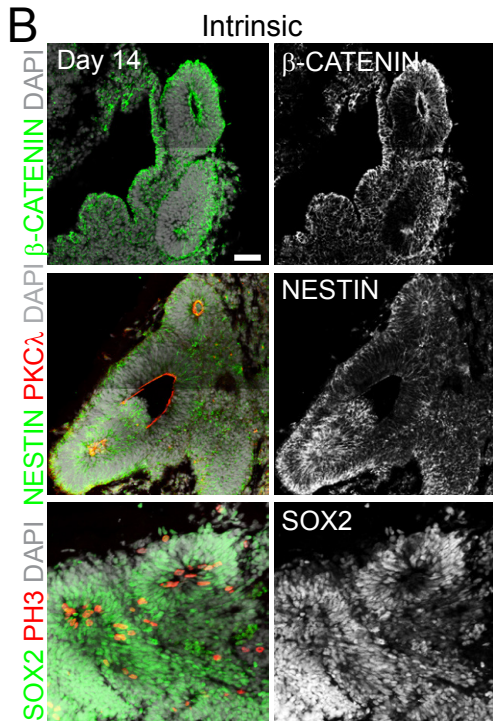**C**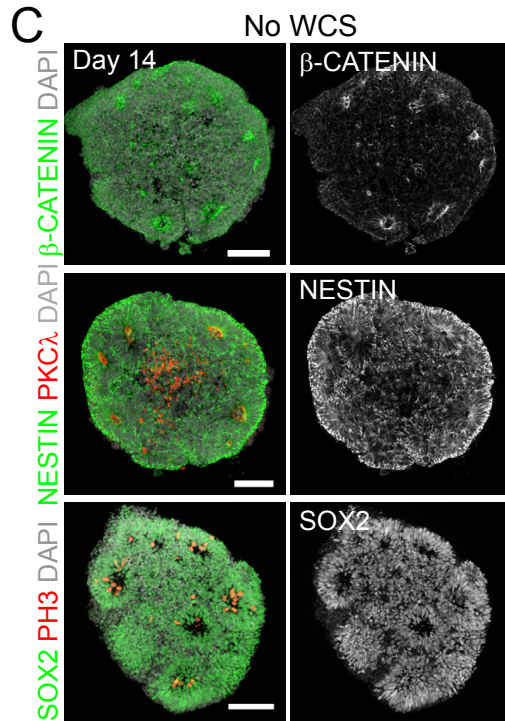**D**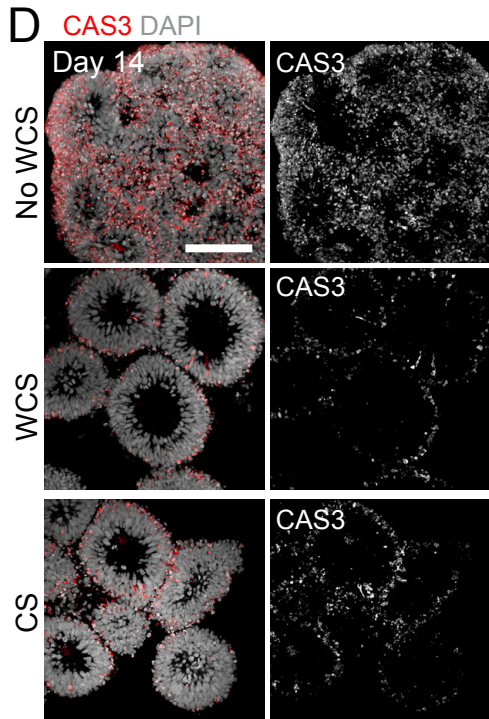**E**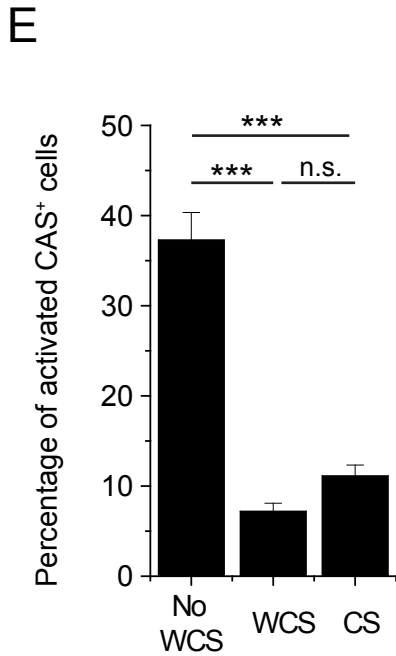**F**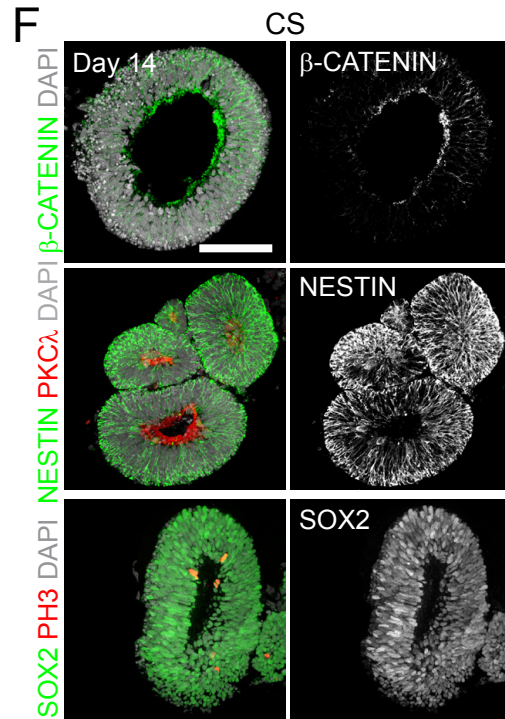**G**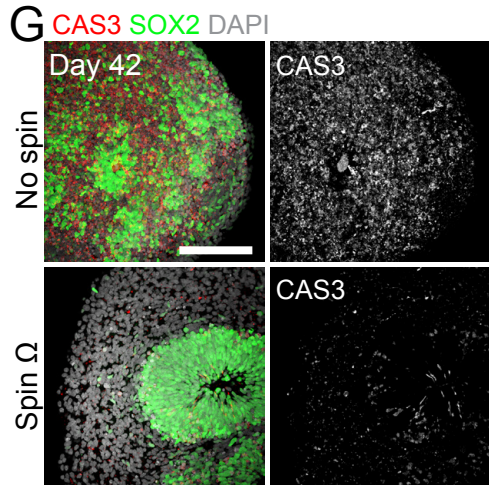**H**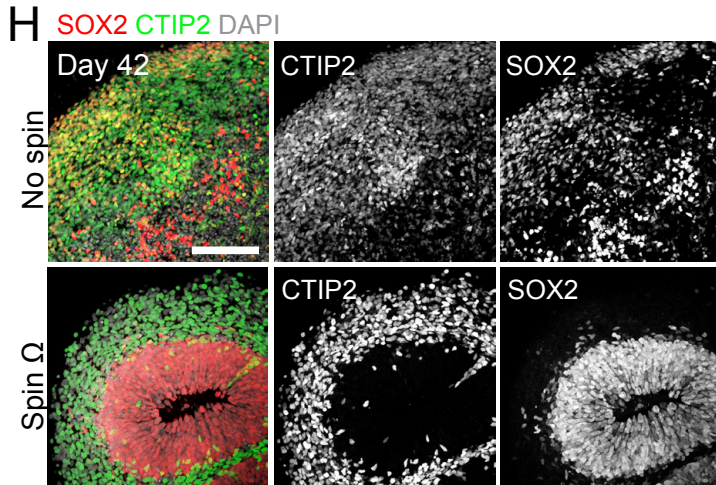**I**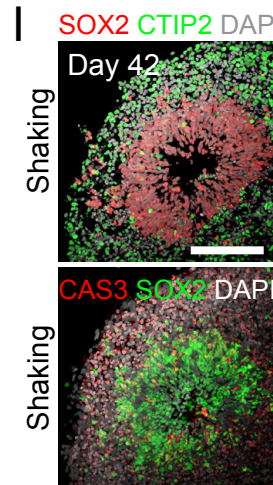

Supplement: NIHMS780987-supplement-1.pdf [file NIHMS780987-supplement-1.pdf]

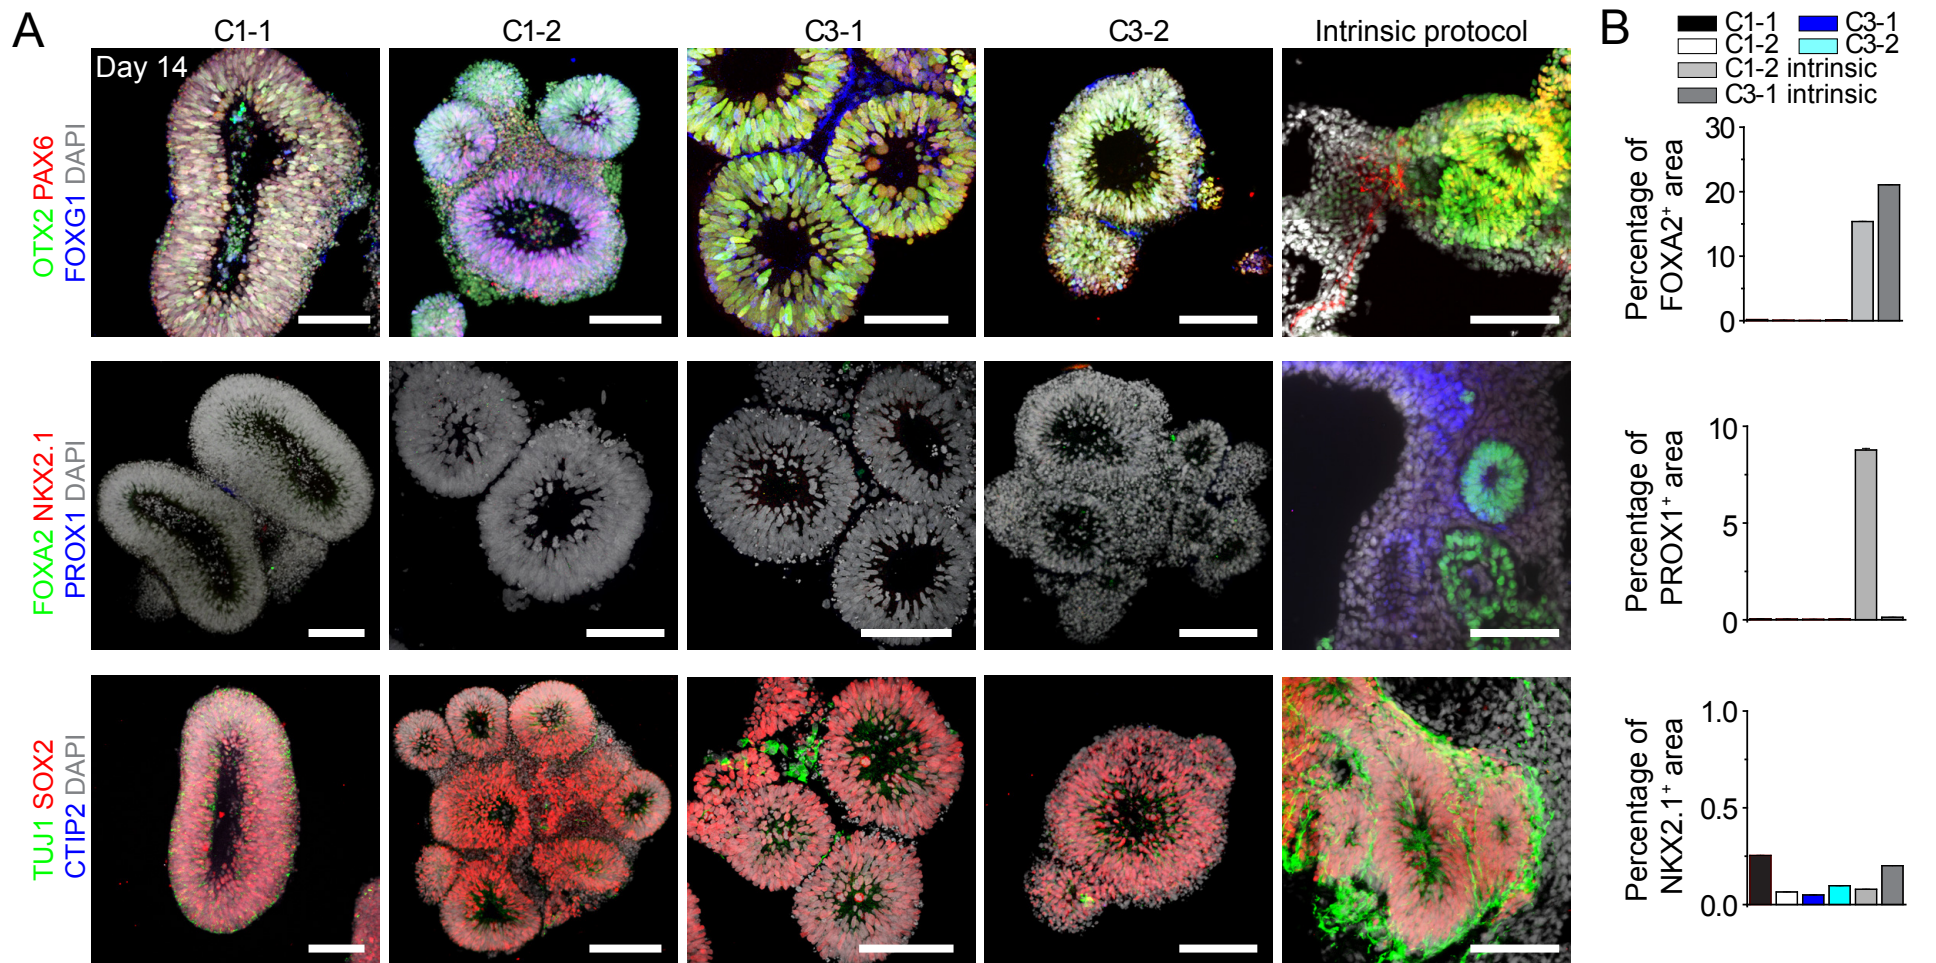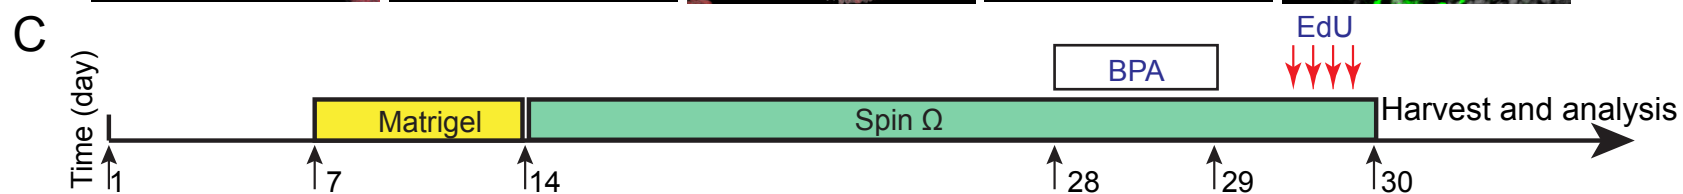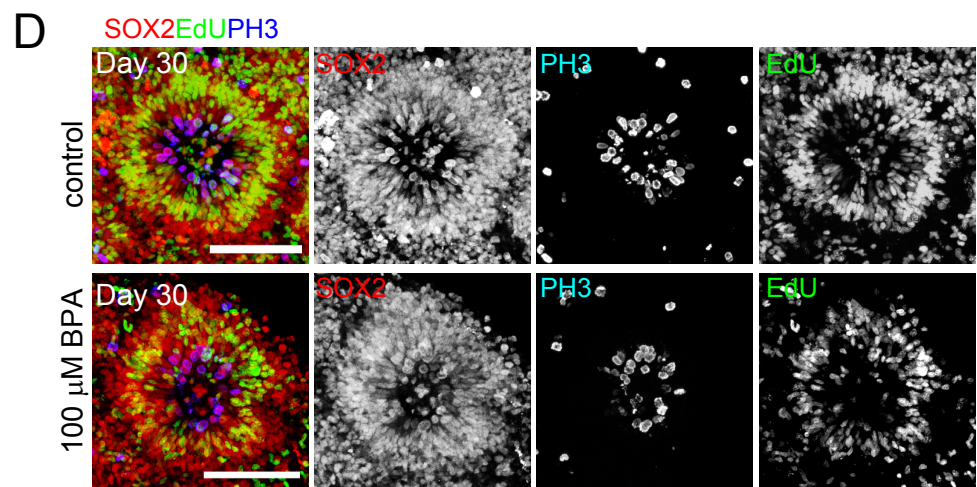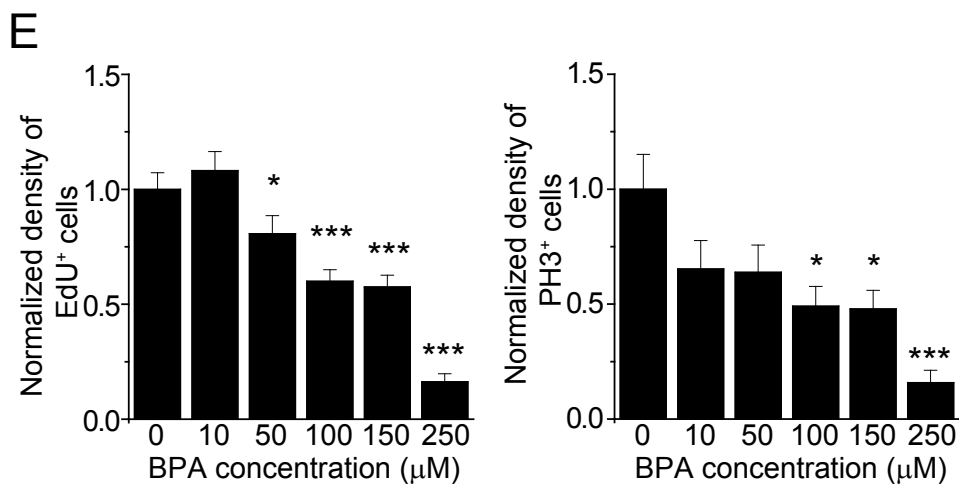

Supplement: NIHMS780987-supplement-2.pdf [file NIHMS780987-supplement-2.pdf]

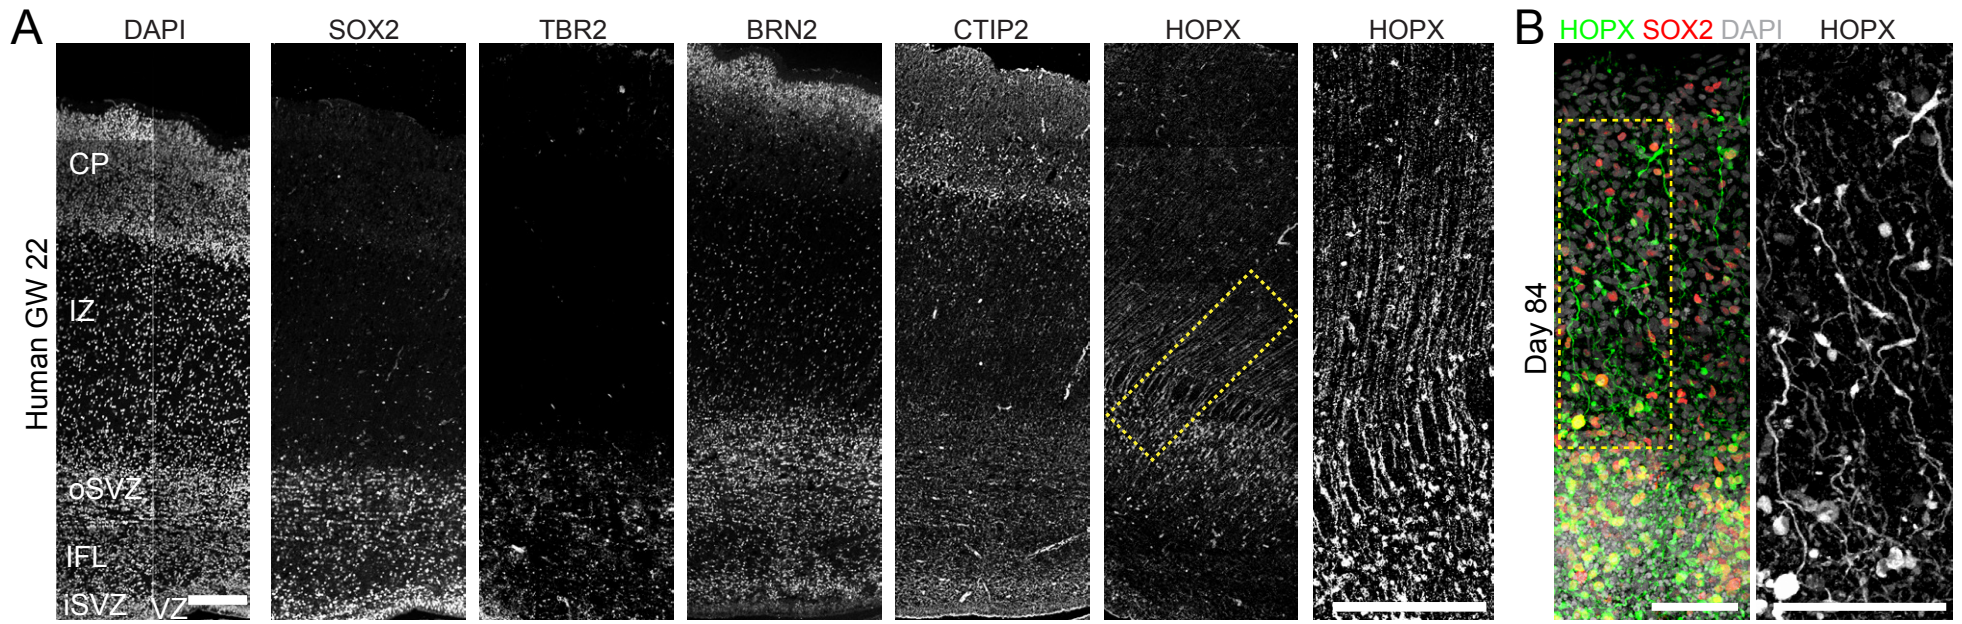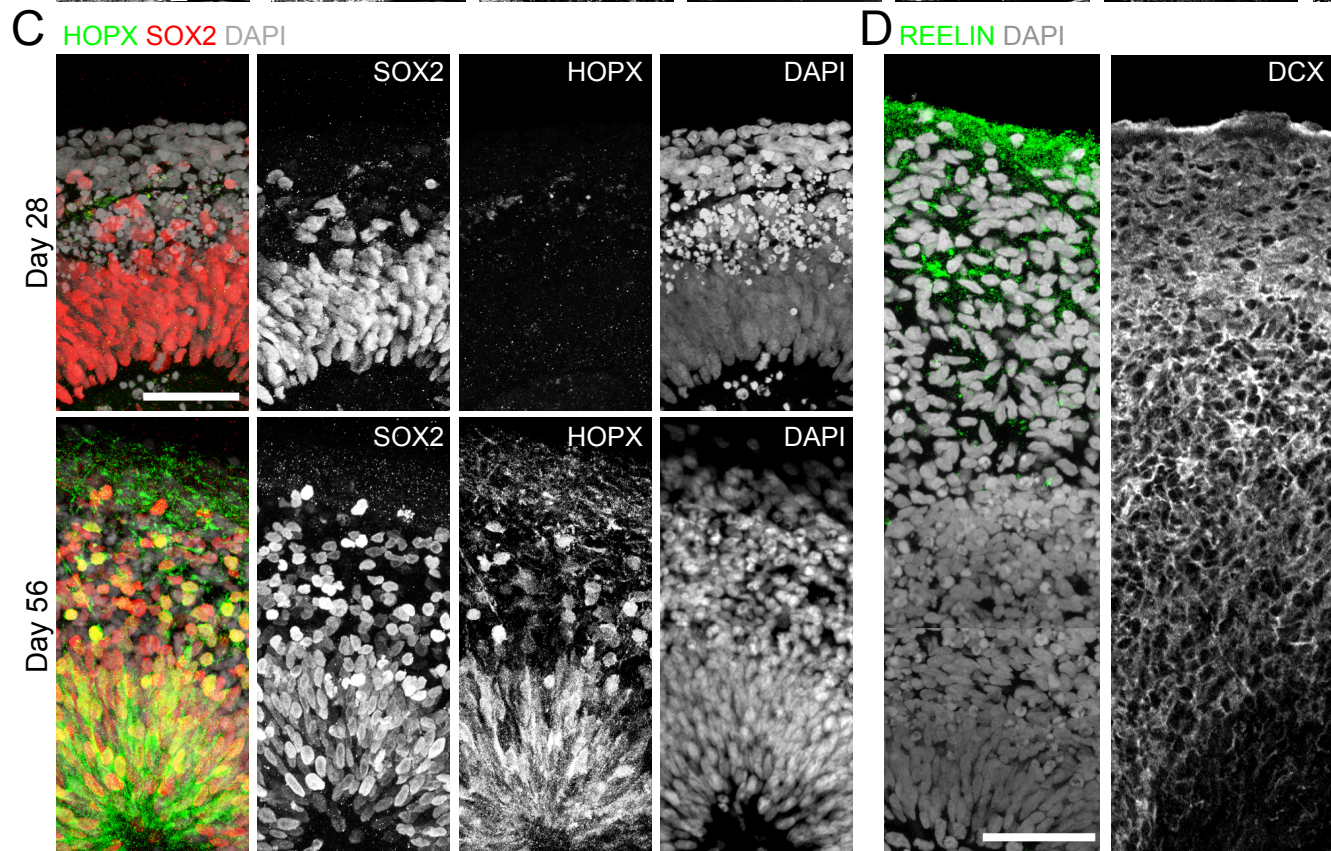

Supplement: NIHMS780987-supplement-3.pdf [file NIHMS780987-supplement-3.pdf]

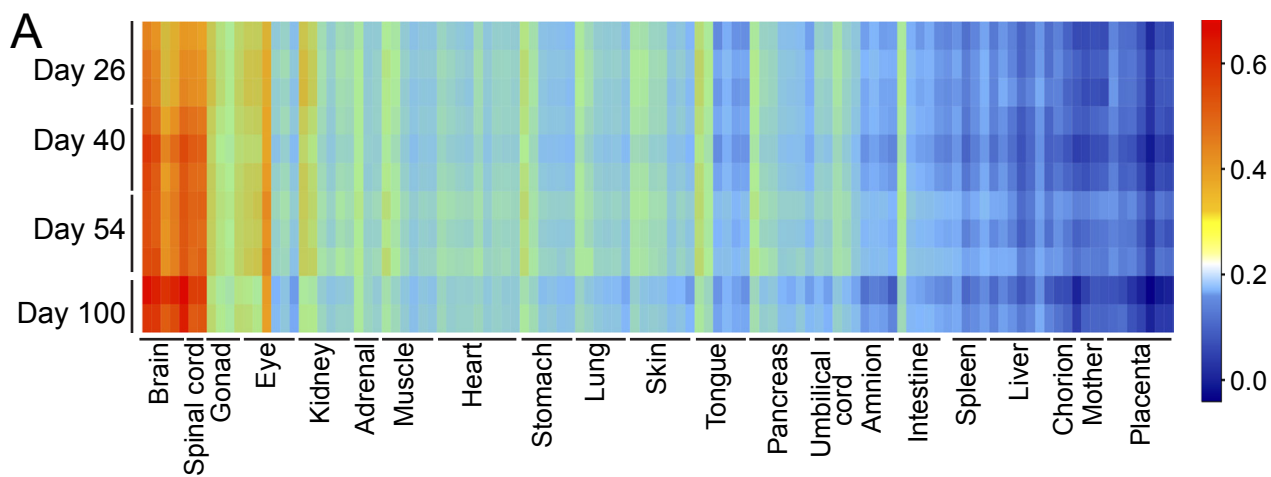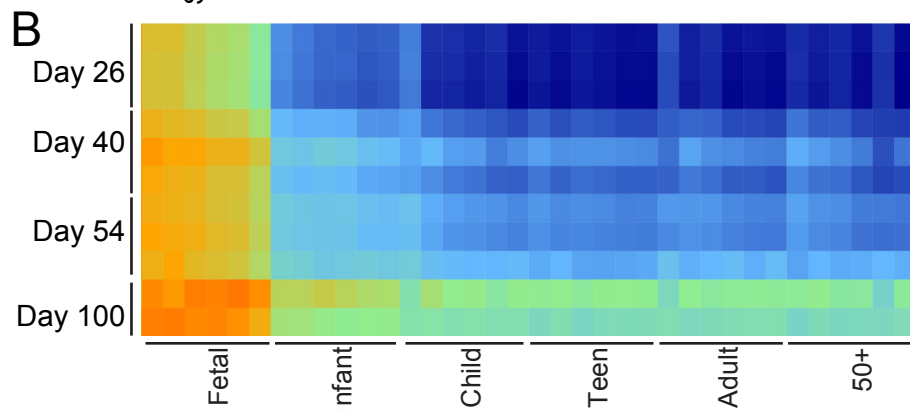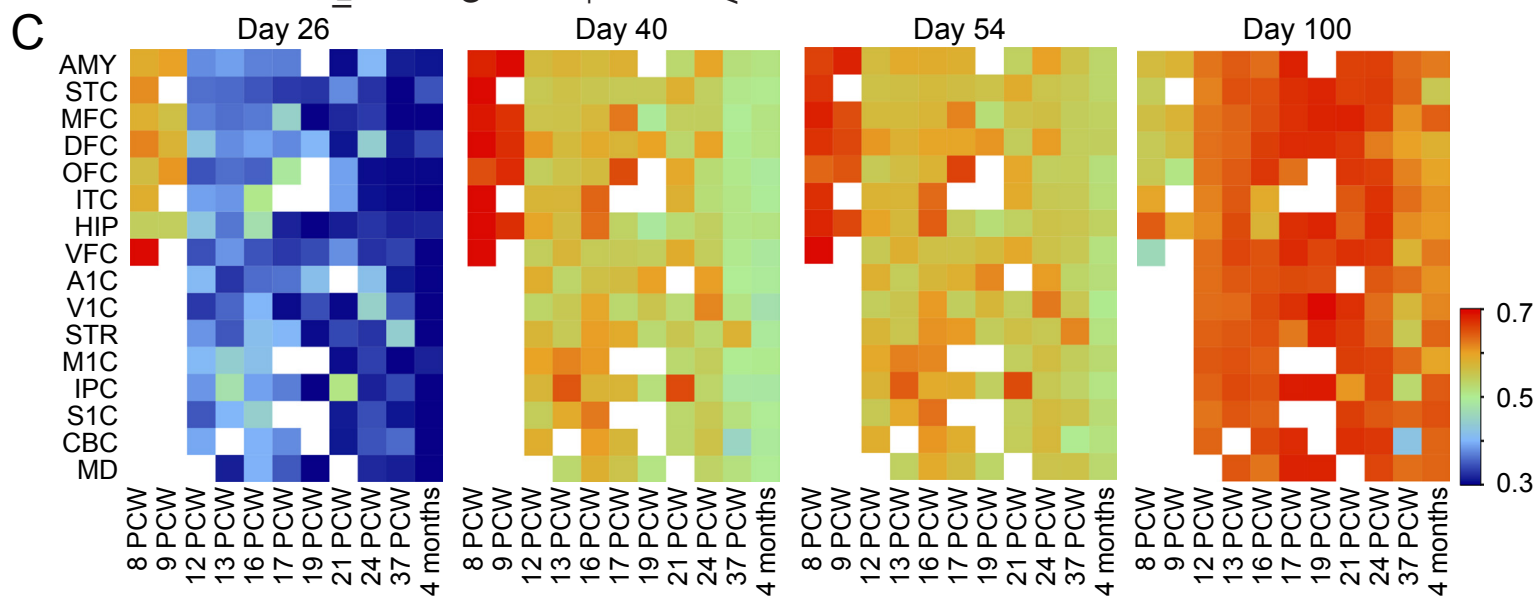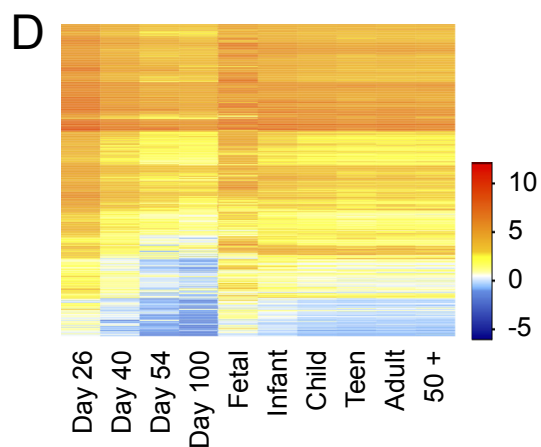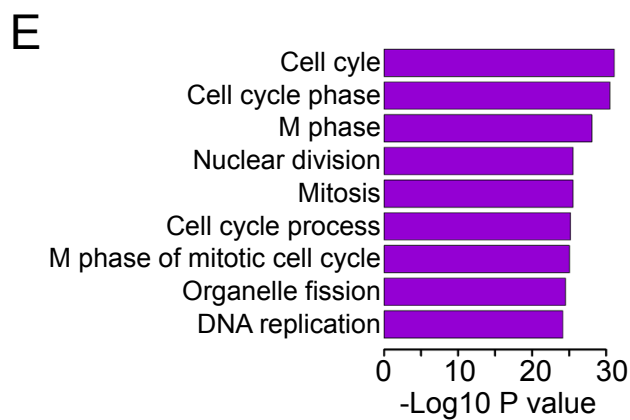

Supplement: NIHMS780987-supplement-4.pdf [file NIHMS780987-supplement-4.pdf]

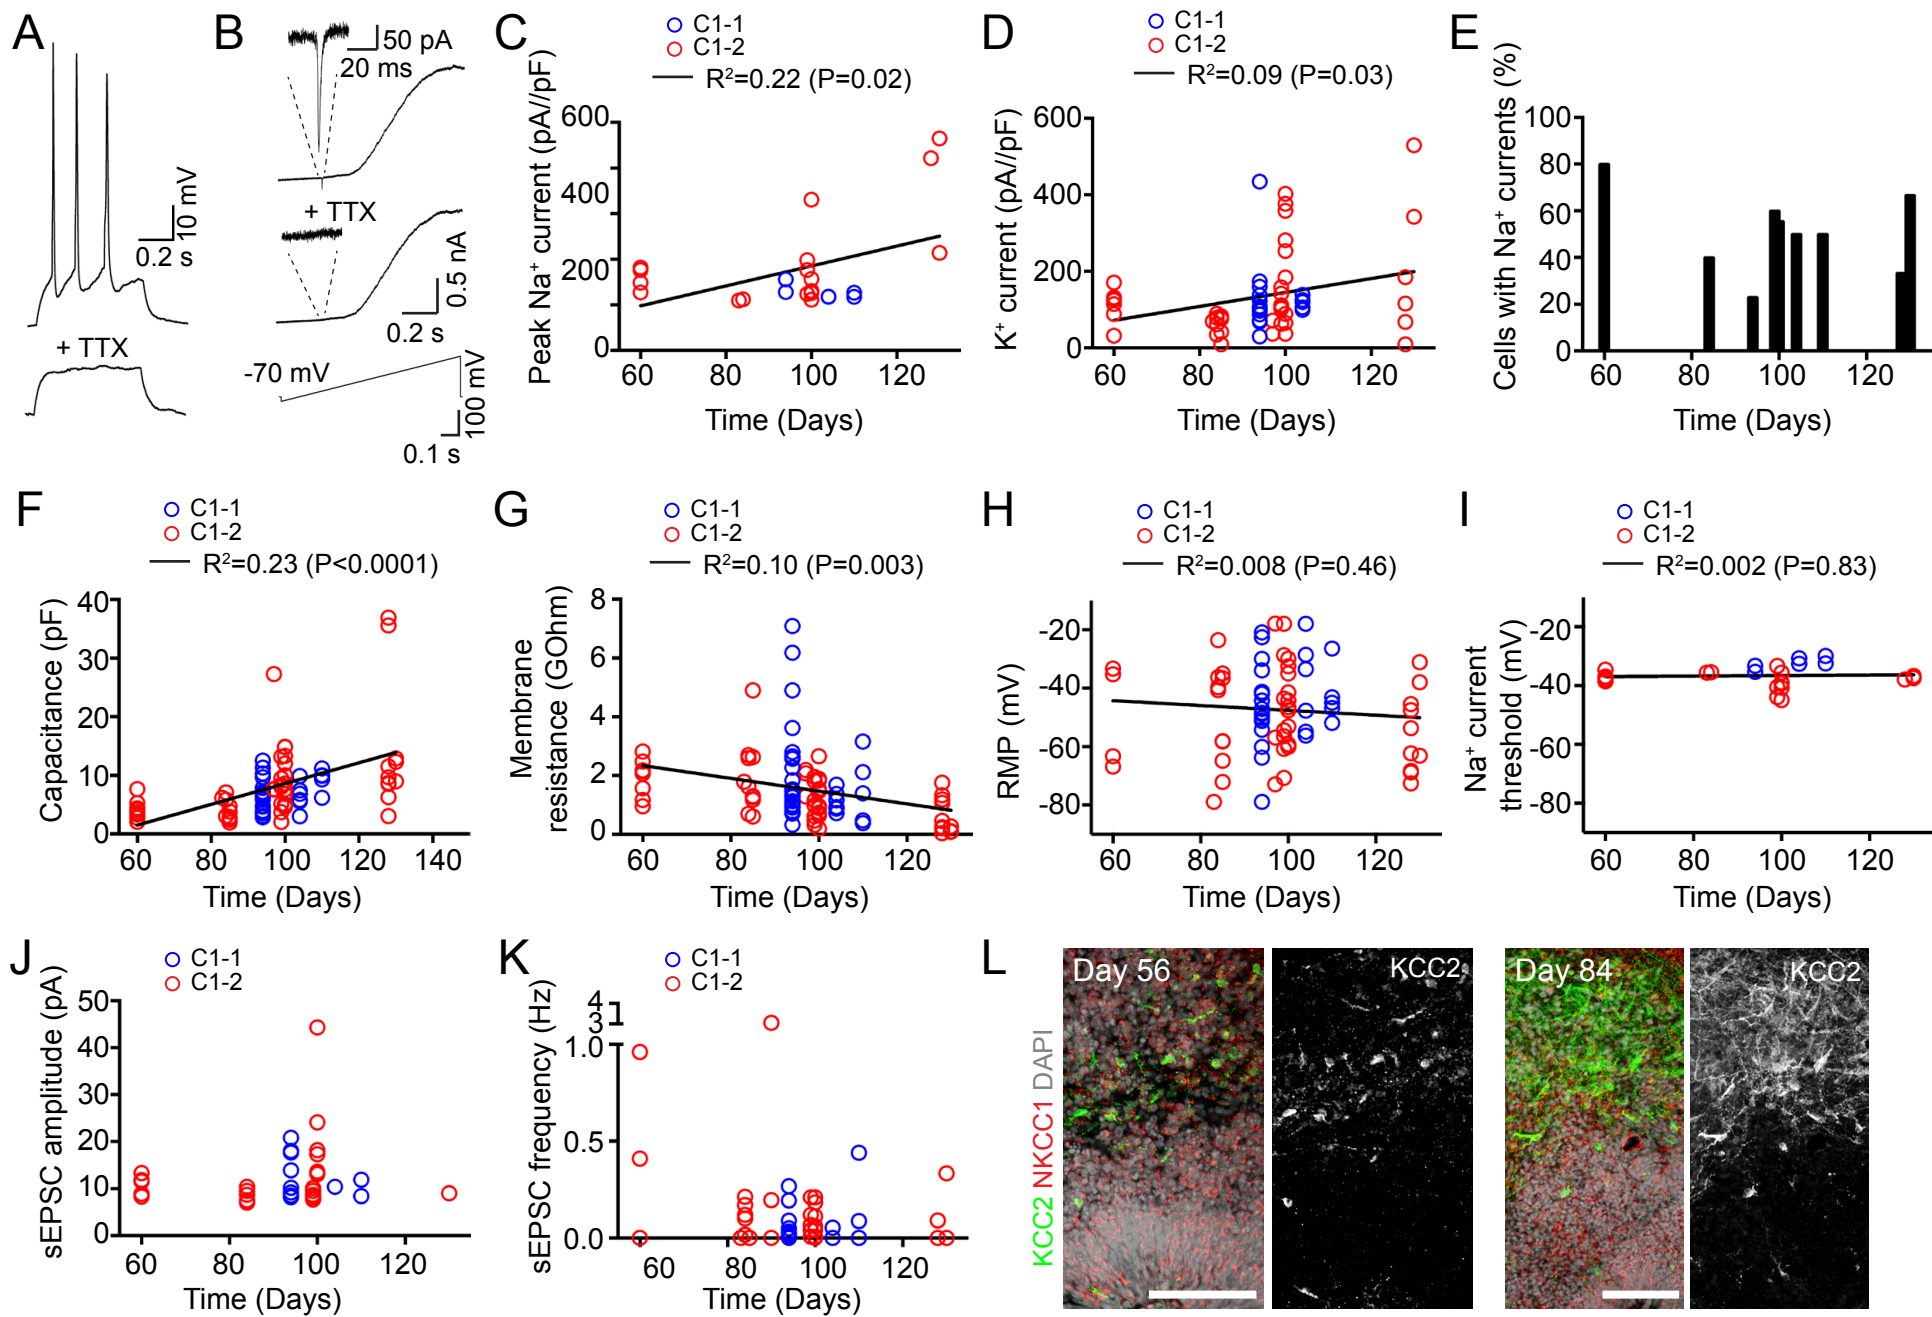

Supplement: NIHMS780987-supplement-5.pdf [file NIHMS780987-supplement-5.pdf]

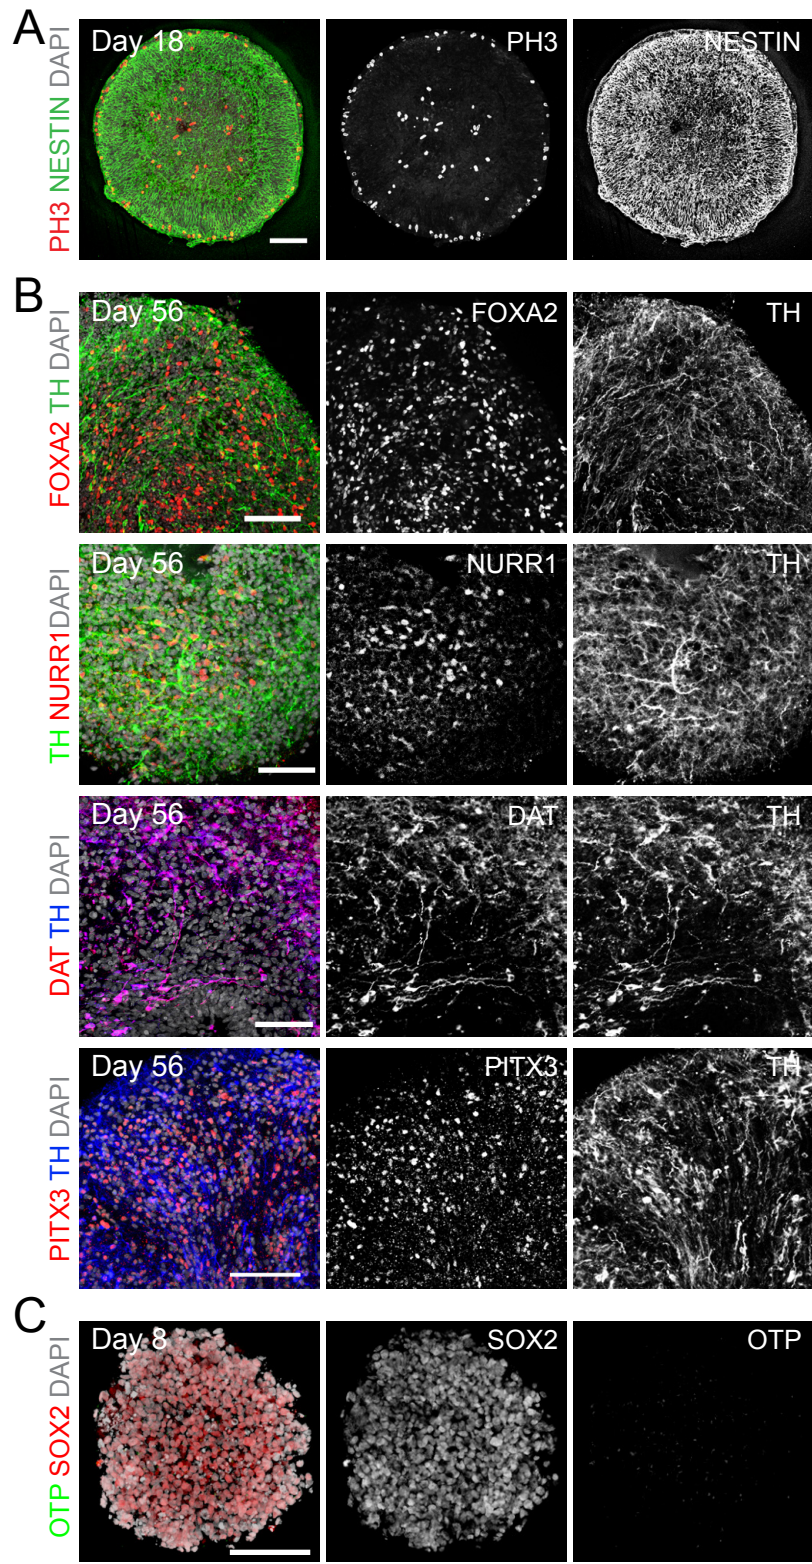

Supplement: NIHMS780987-supplement-6.pdf [file NIHMS780987-supplement-6.pdf]

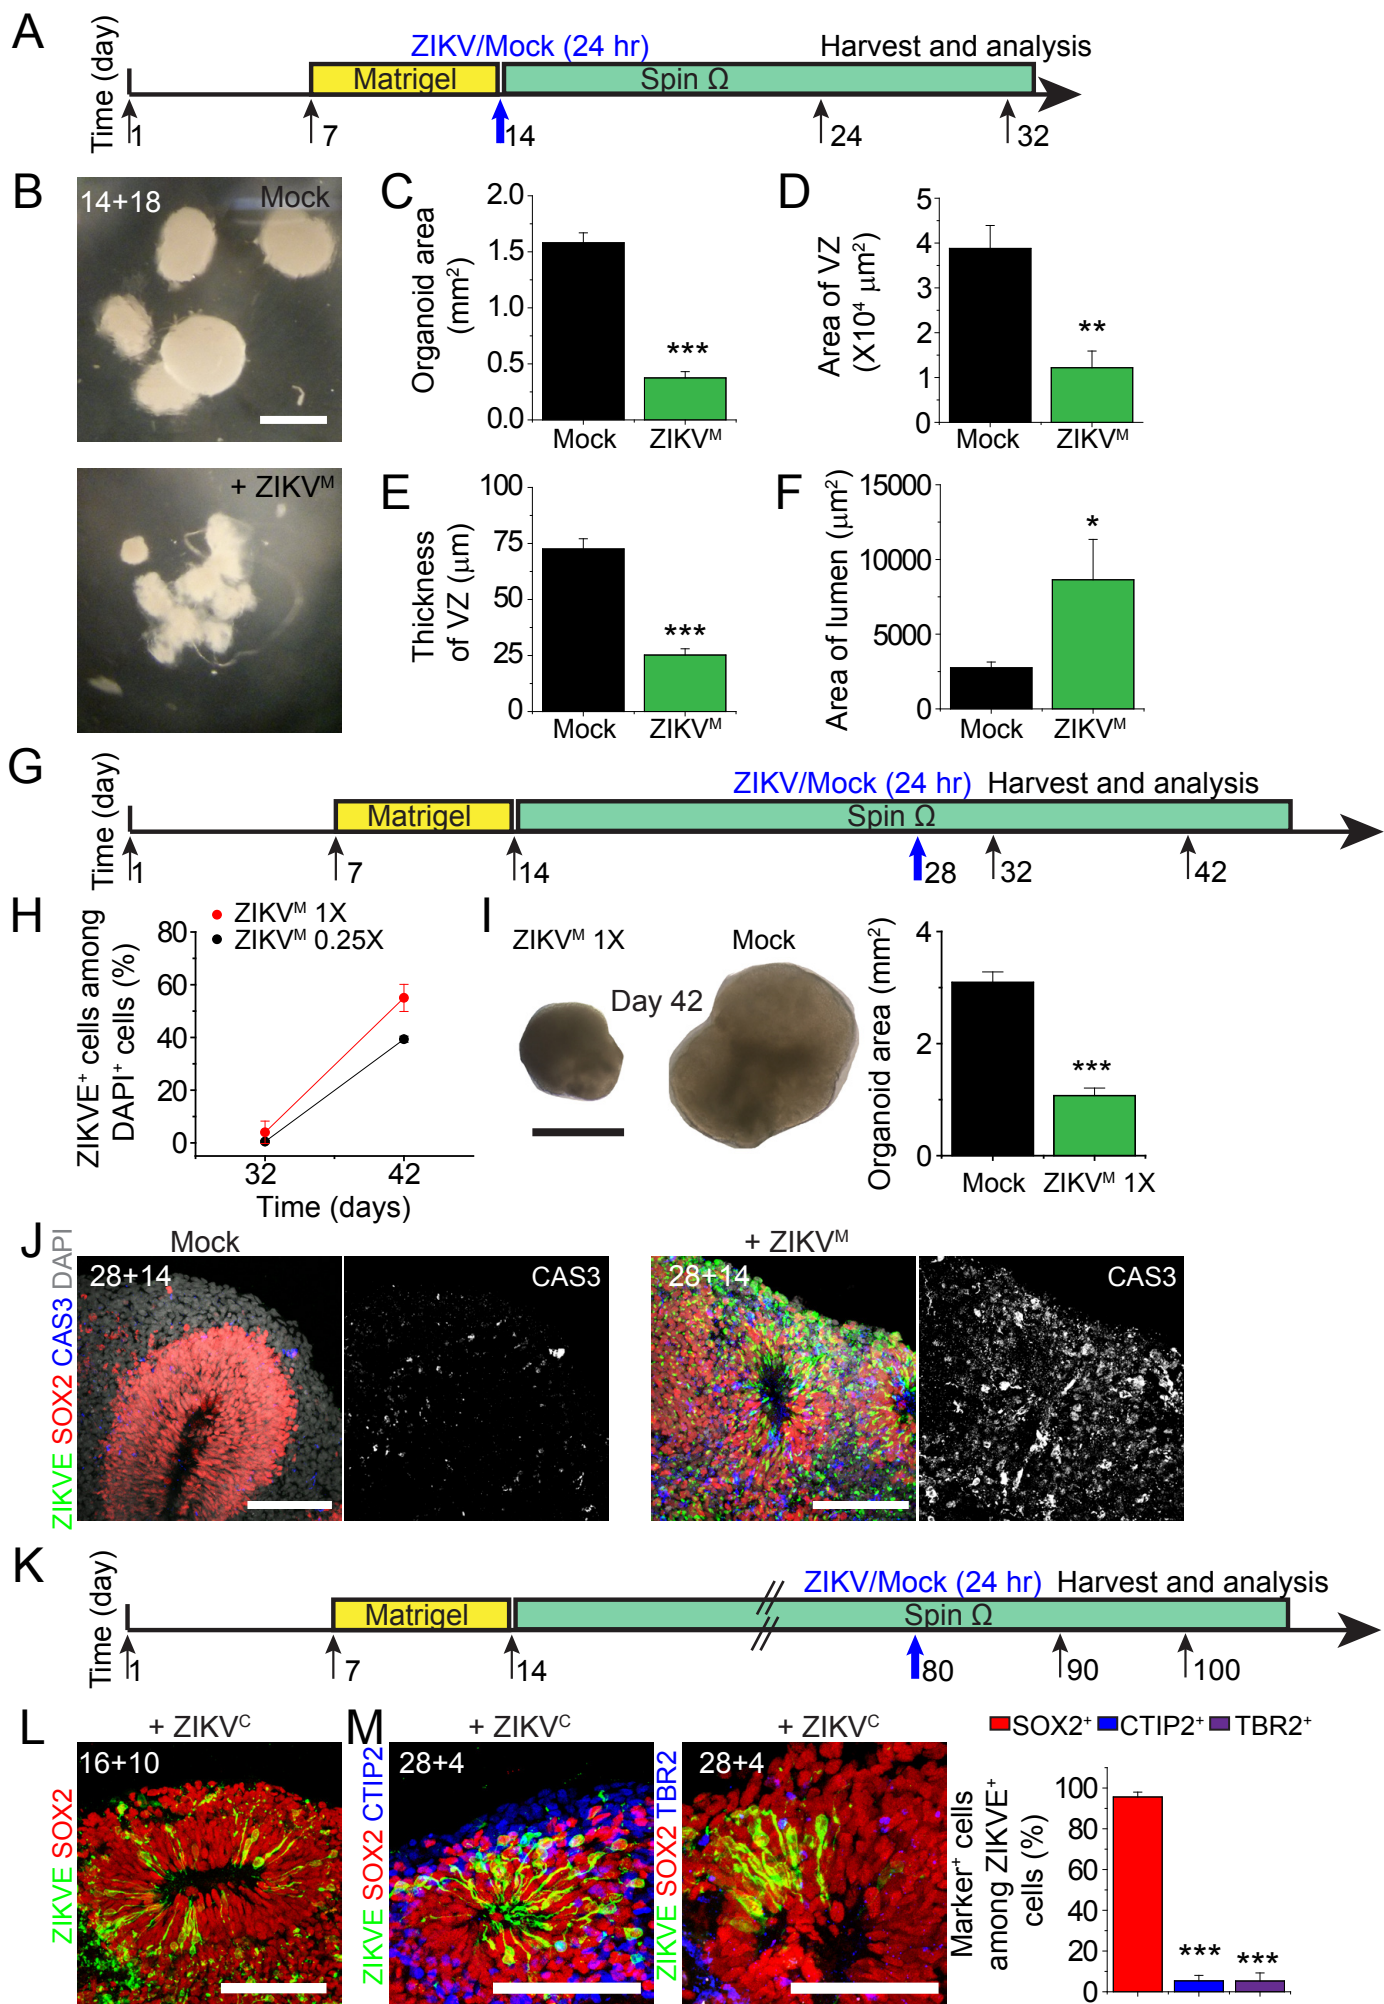

Supplement: NIHMS780987-supplement-7.pdf [file NIHMS780987-supplement-7.pdf]
